# Supplementary material
Source: PubMed Central journal article supplement (PMC3160690)

**Figure S1A**

Rarefaction curves for Galapagos land iguanas

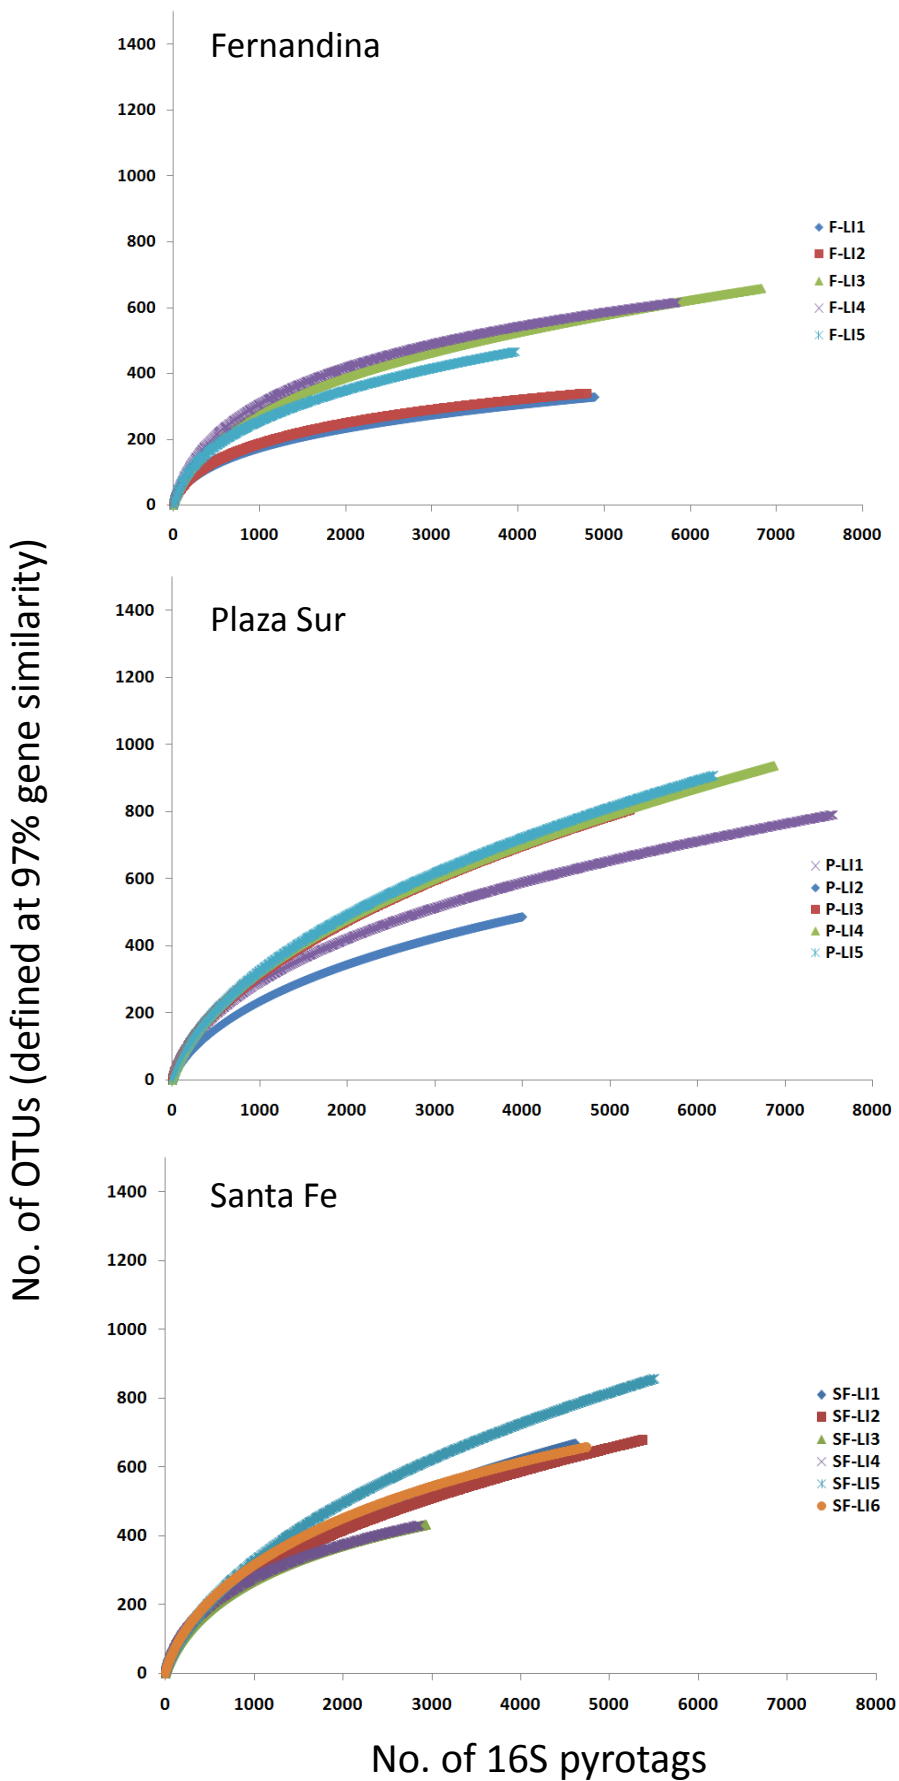

**Figure S1B**

Rarefaction curves for Galapagos marine iguanas

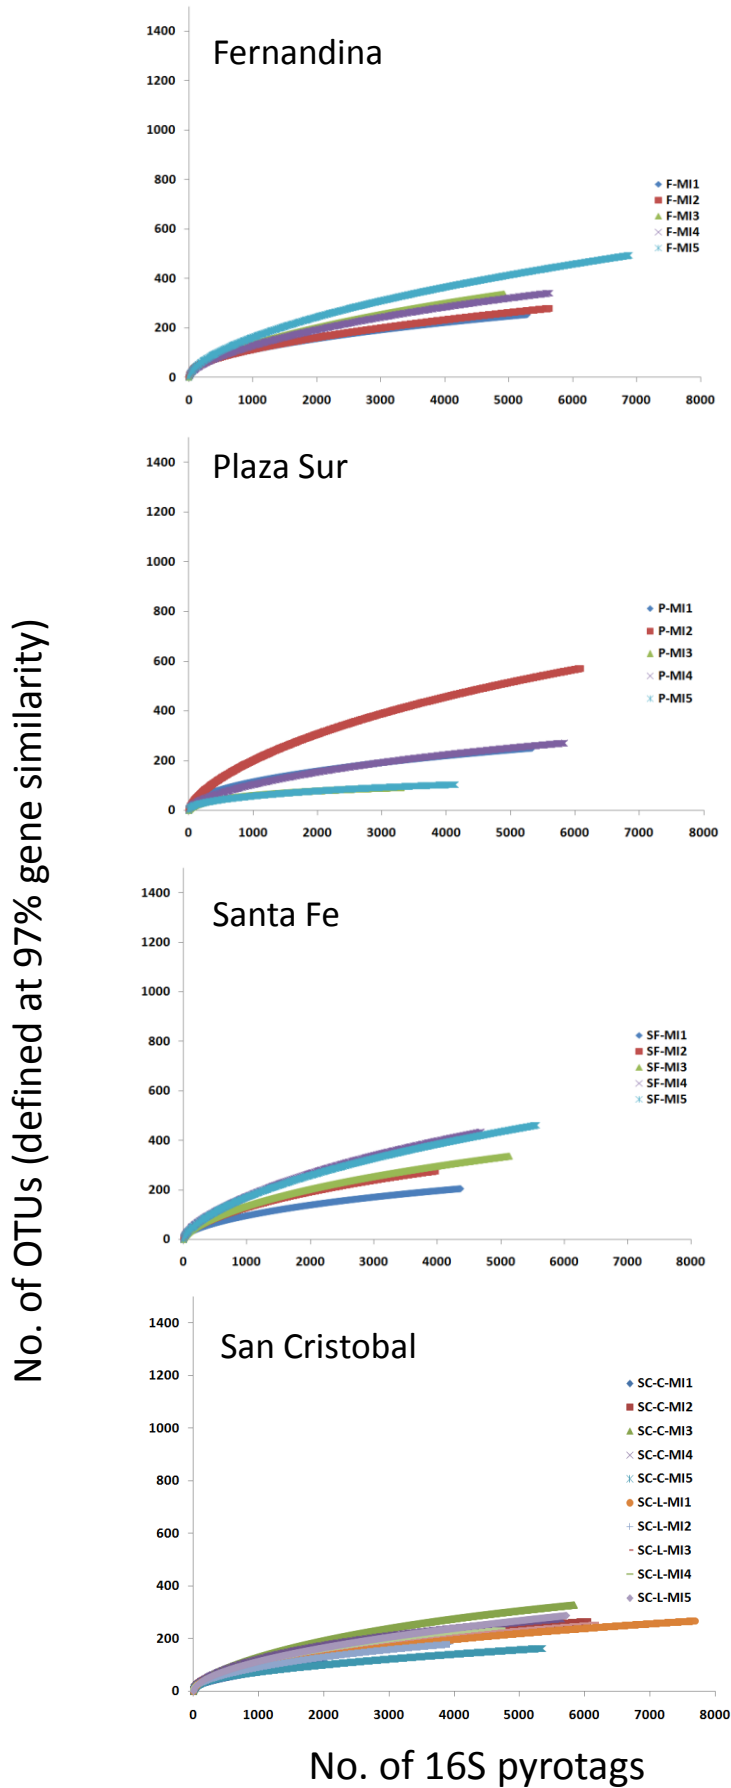

**Figure S1C** Rarefaction curves for Galapagos giant tortoises

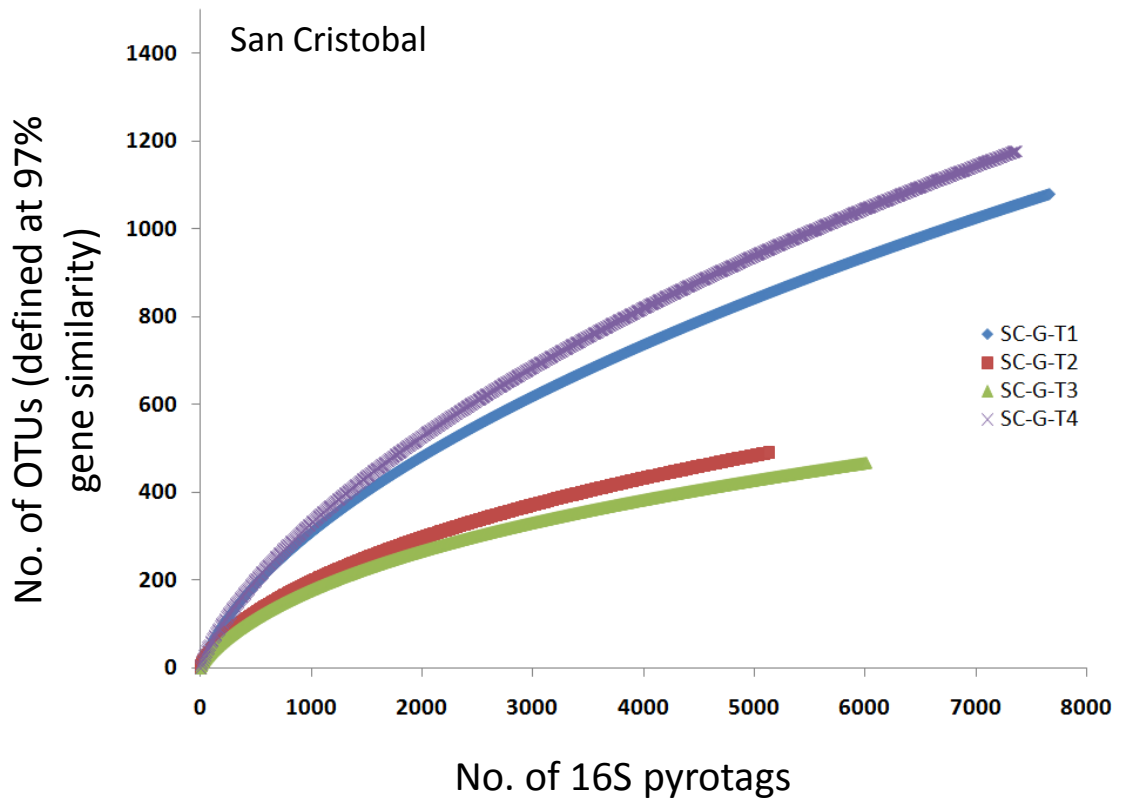

Rarefaction curves for green iguanas

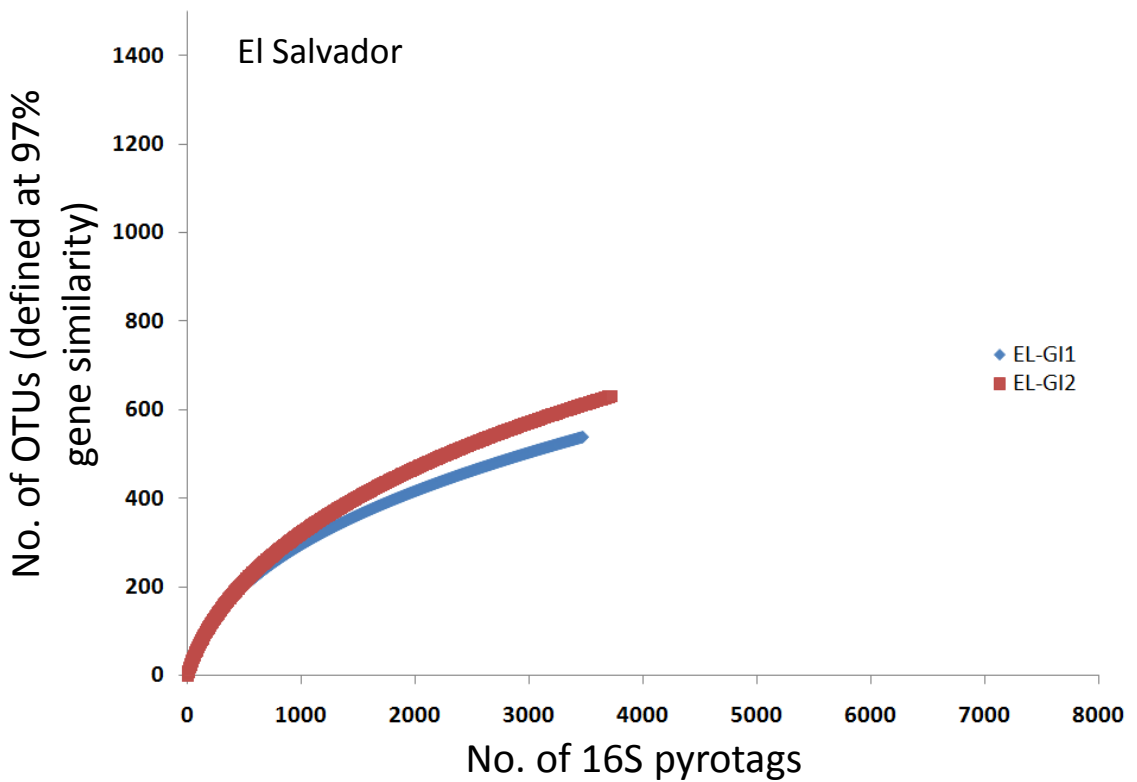

Supplement: ismej201133x1.pdf [file ismej201133x1.pdf]
