# Supplementary material
Source: PubMed Central journal article supplement (PMC3160690)

**Figure S2.** Jaccard dissimilarity was calculated to determine the extent of differences in gut microbiota among the host species

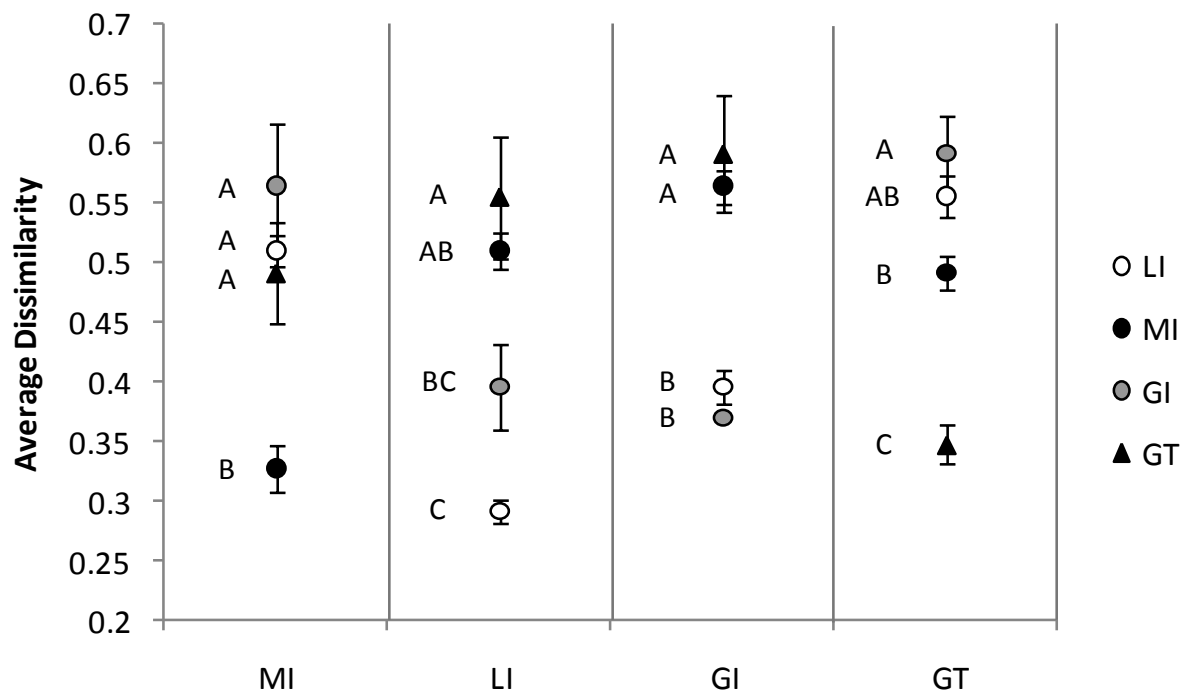

| Comparison of Jaccard dissimilarity index between the different host species |              |                |               |                 |
|------------------------------------------------------------------------------|--------------|----------------|---------------|-----------------|
|                                                                              | Land iguanas | Marine iguanas | Green iguanas | Giant tortoises |
| Land iguanas                                                                 | <b>0.29</b>  |                |               |                 |
| Marine iguanas                                                               | 0.51         | <b>0.33</b>    |               |                 |
| Green iguanas                                                                | 0.40         | 0.56           | <b>0.37</b>   |                 |
| Giant tortoises                                                              | 0.56         | 0.49           | 0.59          | <b>0.35</b>     |

**Figure S3.** Abundances of bacterial classes and their distribution in the individual reptiles

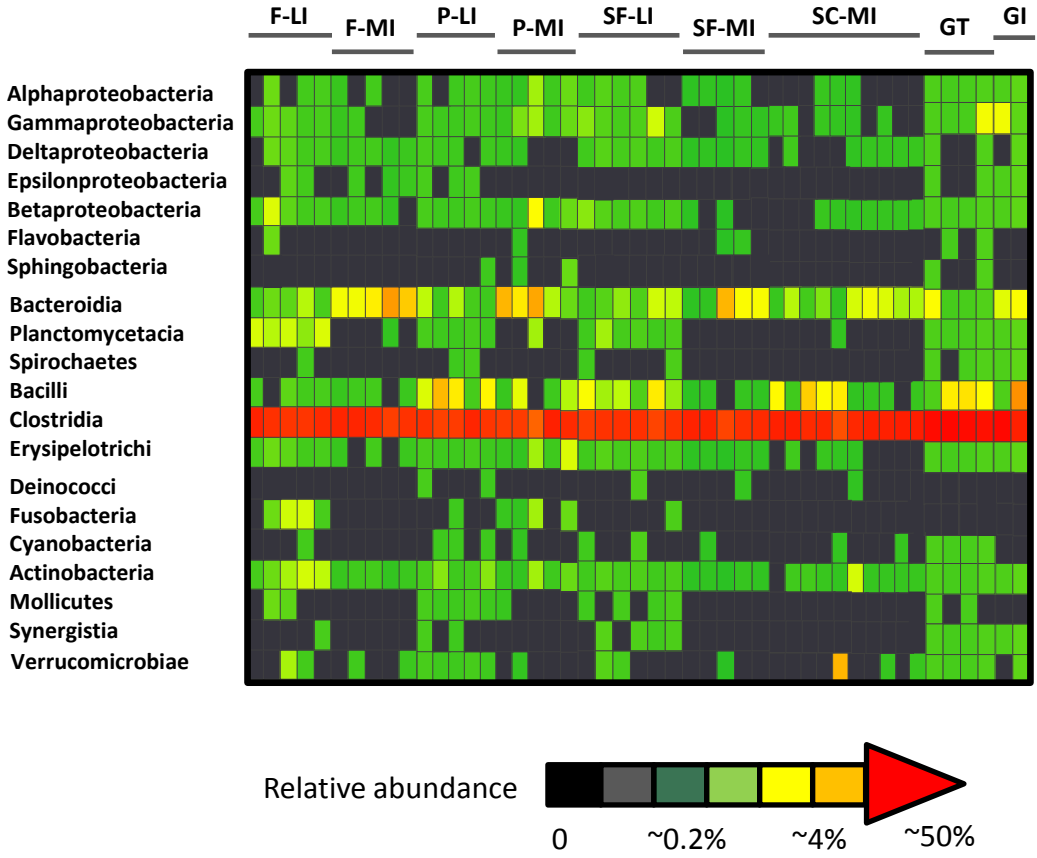

Supplement: ismej201133x2.pdf [file ismej201133x2.pdf]
